# Supplementary material for: A Tug of War Between Condensate Phases in a Minimal Macromolecular System
Source: bioRxiv or medRxiv preprint supplement (doi:10.1101/2020.01.29.925099), 2020-01-30
Supplement: Supplementary file [file media-1.pdf]

## **Supplementary Information**

### **A Tug of War Between Condensate Phases of a Minimal Macromolecular System**

Archishman Ghosh<sup>1</sup>, Xiaojia Zhang<sup>1</sup>, and Huan-Xiang Zhou<sup>1,2</sup>

<sup>1</sup>Department of Chemistry and <sup>2</sup>Department of Physics, University of Illinois at Chicago,  
Chicago, IL 60607

Correspondence should be addressed to H.X.Z. (e-mail: [hzhou43@uic.edu](mailto:hzhou43@uic.edu)).

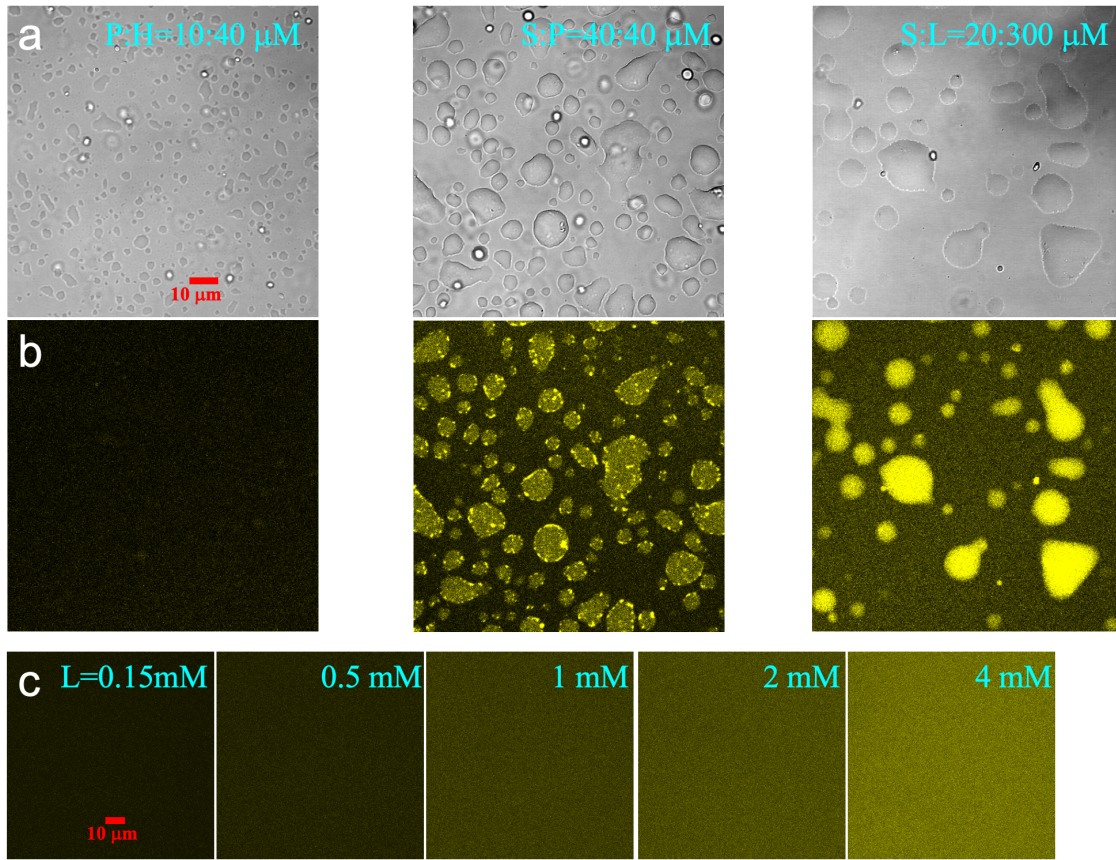

**Supplementary Figure 1 | Different extents of ThT binding to P:H, S:P, and S:L droplets and to L in solutions at varying concentrations. (a)** Brightfield images of P:H, S:P, and S:L droplets after fusion and spread over a coverslip. **(b)** Images of the corresponding droplets shown by ThT fluorescence, indicating no, moderate, and strong ThT binding. Images shown here were taken over a large field of view, from which a cropped region is shown in Fig. 1c. **(c)** Fluorescence images of ThT mixed into five L solutions at concentrations ranging from 0.15 to 4 mM.

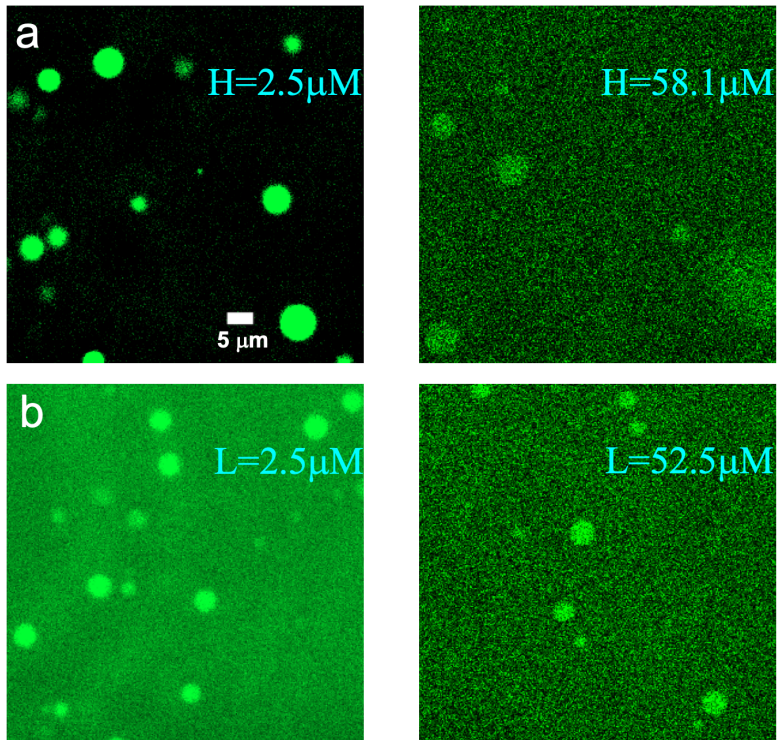

**Supplementary Figure 2 | Images of S:P:H and S:P:L droplets, shown by fluorescence of FITC-heparin and FITC-lysozyme, with S:P = 40:40  $\mu\text{M}$ . (a) S:P:H, with H at 2.5 or 58.1  $\mu\text{M}$ . (b) S:P:L, with L at 2.5 or 52.5  $\mu\text{M}$ . Here the concentration of each labeled species was 2.5  $\mu\text{M}$ ; images at H = 2.5  $\mu\text{M}$  and at L = 2.5  $\mu\text{M}$  have appeared previously [Ghosh et al. Proc Natl Acad Sci USA 116, 194740-19483 (2019)].**

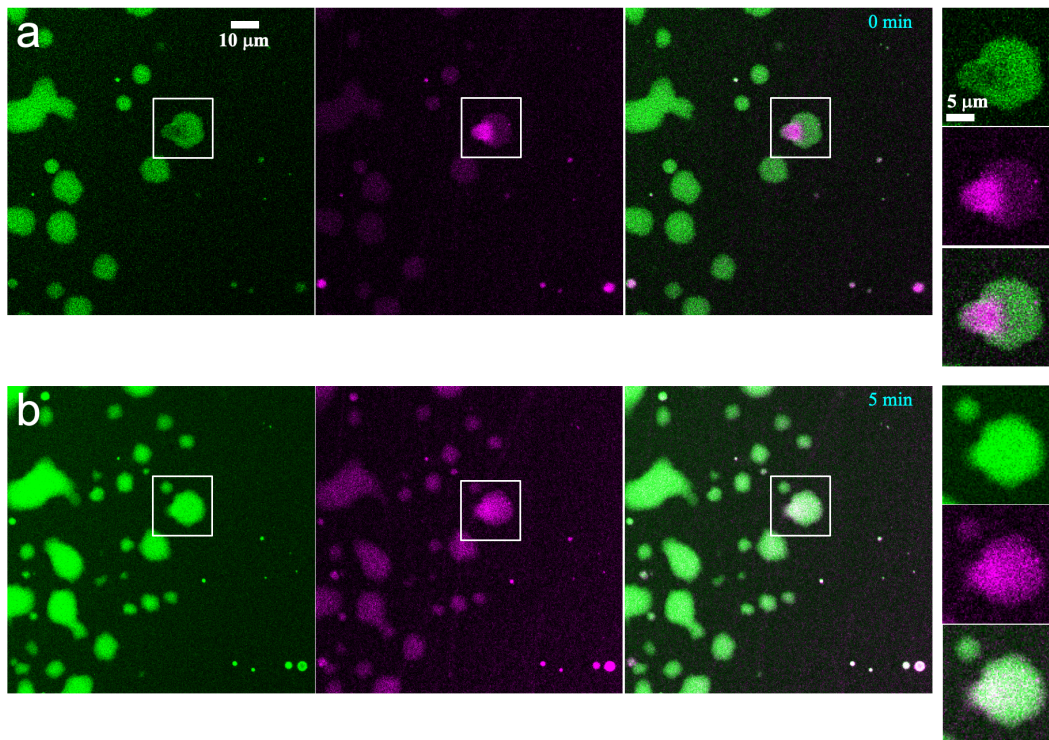

**Supplementary Figure 3 | Images of P:H droplets mixing with S:L droplets, shown by fluorescence of FITC-heparin (green) and Cy5-lysozyme (magenta). (a)** After placing two drops, containing P:H and S:L droplets, respectively, side by side (the former is on the left and the latter on the right), a P:H droplet falls on top of an S:L droplet (region inside white box). From left to right: green channel, magenta channel, their merge, and enlarged views of the boxed region. **(b)** Corresponding images after 5 min, showing fusion and content mixing of the P:H and S:L droplets. P:H = 40:40  $\mu$ M and S:L = 30:300  $\mu$ M. The drops also contained 100 g/L Ficoll70.
